# Supplementary material for: WM130 preferentially inhibits hepatic cancer stem-like cells by suppressing AKT/GSK3β/β-catenin signaling pathway
Source: PubMed Central journal article supplement (PMC5346734; doi:10.18632/oncotarget.12822), 2016-10-22
Supplement: oncotarget-07-79544-s001.pdf [file oncotarget-07-79544-s001.pdf]

## WM130 preferentially inhibits hepatic cancer stem-like cells by suppressing AKT/GSK3 $\beta$ / $\beta$ -catenin signaling pathway

### SUPPLEMENTARY FIGURES AND TABLE

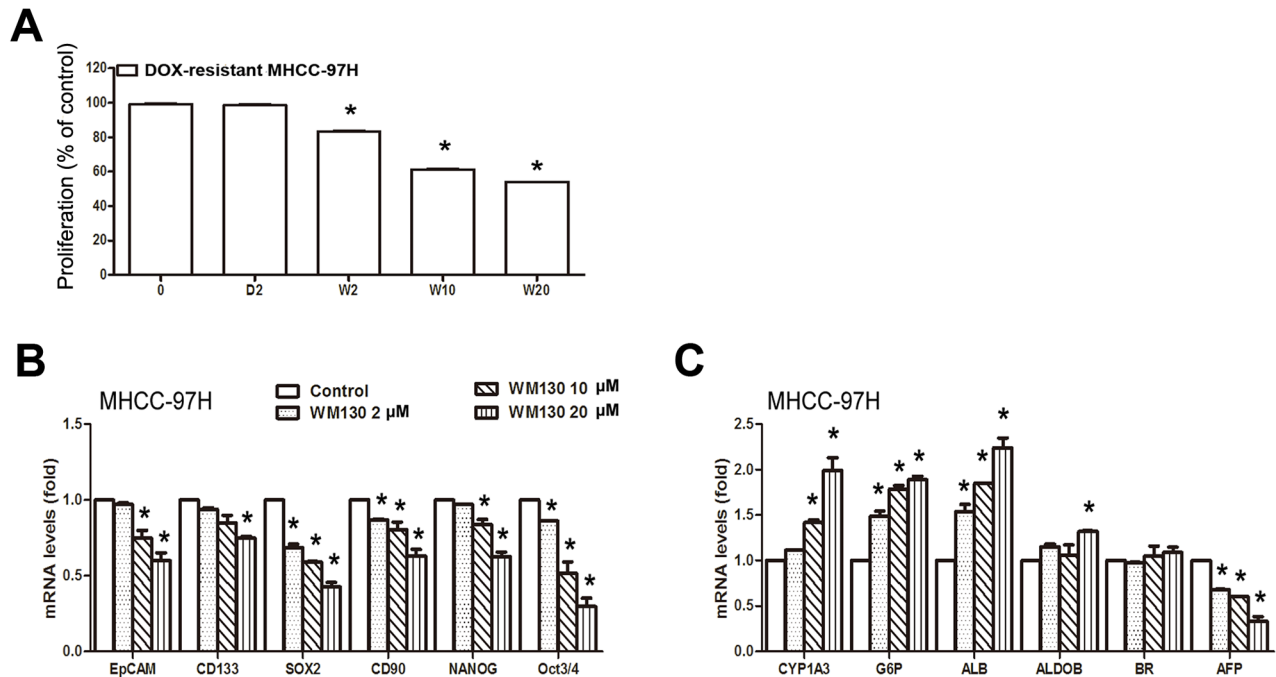

**Supplementary Figure S1: The effect of WM130 on DOX-resistant MHCC-97H cells and the expression of genes relevant to stemness and differentiation of hepatic stem/progenitor cells.** A. DOX-resistant MHCC-97H cells remained sensitive to WM130. N=3, \* $p$ <0.05 versus control. B and C. MHCC-97H cells were treated with WM130 for 24 h. The expression of “stemness” and liver-specific genes was detected by real-time RT-PCR. The mRNA levels were normalized against  $\beta$ -actin and are relative to the control. N=3, \* $p$ <0.05 versus control.

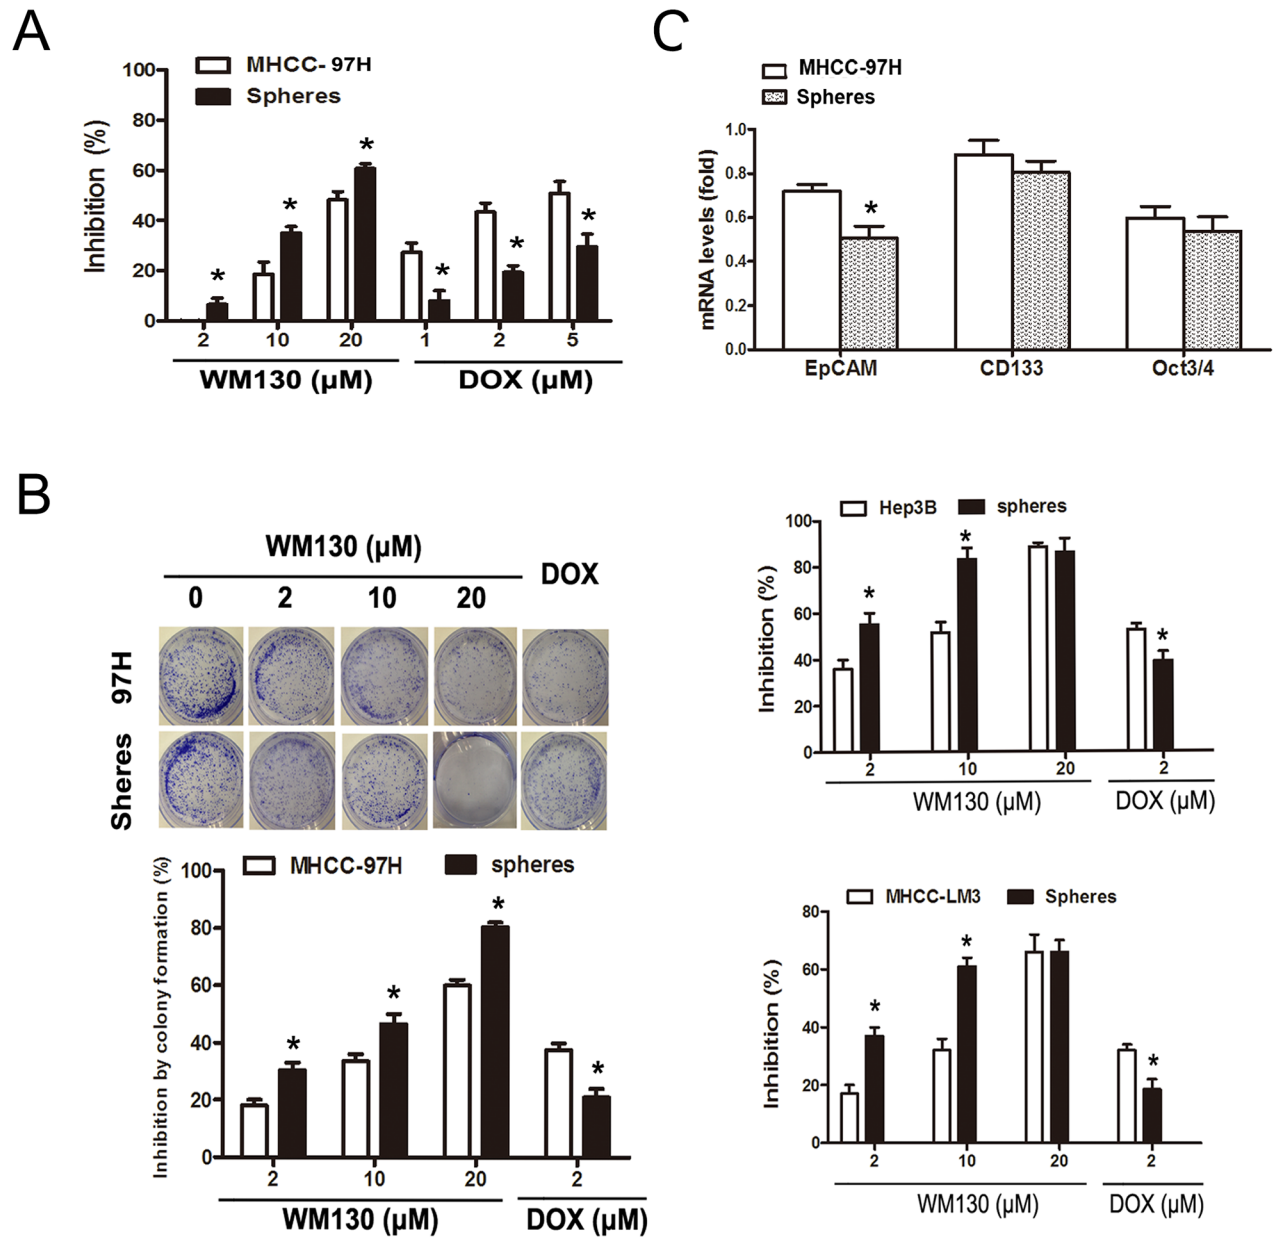

**Supplementary Figure S2: Preferential inhibition of MHCC-97H sphere cells by WM130.** **A.** Growth inhibitory effects of WM130 and DOX on MHCC-97H sphere cells compared with their corresponding parental cells. N=3, \* $p < 0.05$  versus control. **B.** Inhibition of colony formation by WM130 and DOX. N=3, \* $p < 0.05$  versus control. **C.** WM130 preferentially decreased EpCAM expression in spheroids. N=3, \* $p < 0.05$  versus control.

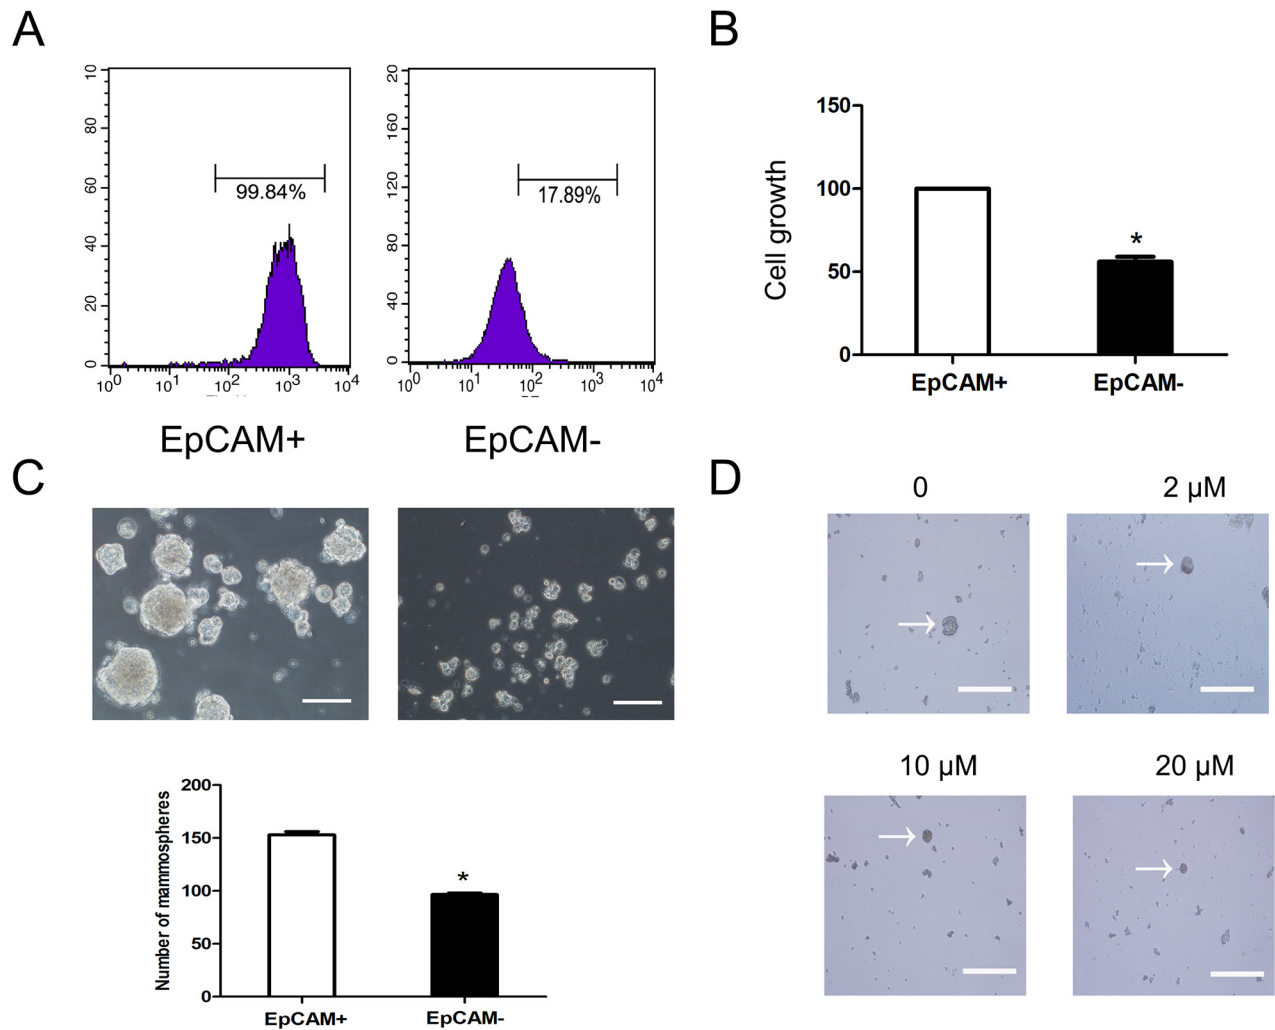

**Supplementary Figure S3: The sorted EpCAM<sup>+</sup> Hep3B cells exhibits features of cancer stem/progenitor cells. A.** Purity of the sorted of EpCAM<sup>+</sup> and EpCAM<sup>-</sup> Hep3B cells. **B.** The sorted EpCAM<sup>+</sup> Hep3B cells exhibited stronger proliferation ability than EpCAM<sup>-</sup> cells. N=3, \* $p < 0.05$  versus EpCAM<sup>+</sup> Hep3B cells. **C.** The sorted EpCAM<sup>+</sup> Hep3B cells exhibited better sphere forming ability than EpCAM<sup>-</sup> cells. N=3, \* $p < 0.05$  versus EpCAM<sup>+</sup> Hep3B cells. Scale bar=100  $\mu$ M. **D.** WM130 noticeably reduced the size of single-cell derived EpCAM<sup>+</sup> monoclonal cells in a concentration dependent manner. Scale bar=100  $\mu$ M.

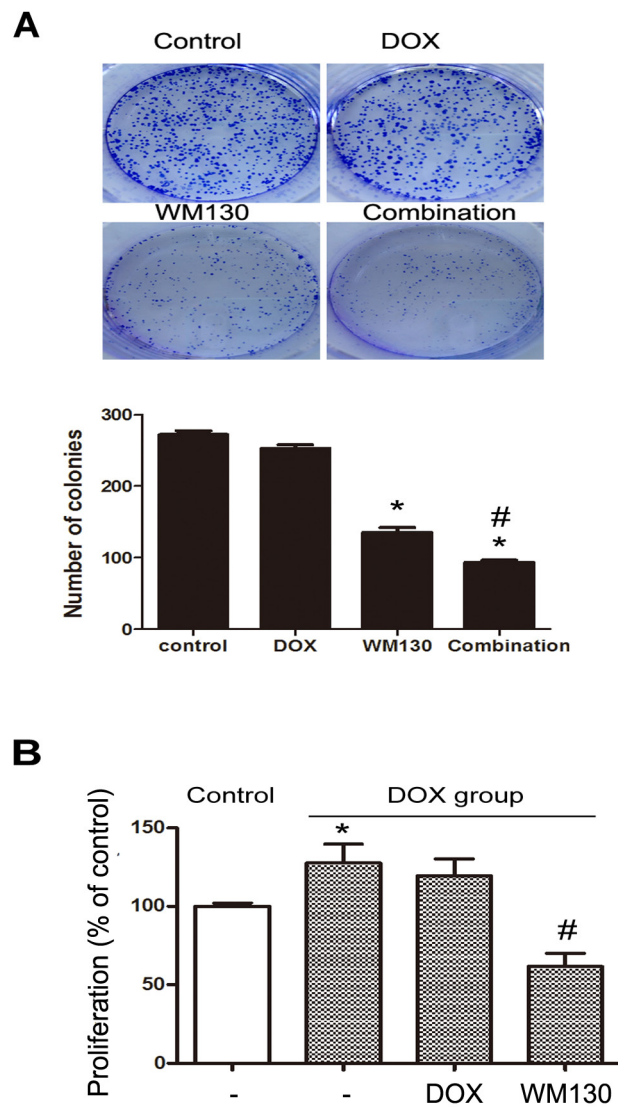

**Supplementary Figure S4: Colony formation and proliferation of cancer cells isolated from dissociated MHCC-LM3 tumors.** **A.** Colony formation of cancer cells isolated from dissociated MHCC-LM3 tumors. N=6, \* $p < 0.05$  versus control and # $p < 0.05$  versus groups treated with either agent alone. **B.** Cancer cells from DOX-treated mice showed higher proliferation compared with cells from control-treated mice and were *in vitro* resistant to DOX (2  $\mu\text{mol/L}$ ) but sensitive to WM130 (10  $\mu\text{mol/L}$ ) as determined by CCK8 assays. N=3, \* $p < 0.05$  versus control-treated mice and # $p < 0.05$  versus untreated control.

Supplementary Table S1: Sequence of primers

| Gene           | Sequence                                                           |
|----------------|--------------------------------------------------------------------|
| <i>β-actin</i> | F: 5'-ACCCACACTGTGCCCATCTATG-3'<br>R: 5'-AGAGTACTTGCGCTCAGGAGGA-3' |
| <i>EpCAM</i>   | F: 5'-GCTCTGAGCGAGTGAGAACCT-3'<br>R: 5'-GACCAGGATCCAGATCCAGTTG-5'  |
| <i>CD133</i>   | F: 5'-ACATGAAAAGACCTGGGGG-3'<br>R: 5'-GATCTGGTGTCCCAGCATG-3'       |
| <i>CD90</i>    | F: 5'-CGGAAGACCCCAGTCCA-3'<br>R: 5'-ACGAAGGCTCTGGTCCACTA-3'        |
| <i>G-6-P</i>   | F: 5'-GGCTCCATGACTGTGGGATC-3'<br>R: 5'-TTCAGCTGCACAGCCCAGAA-3'     |
| <i>ALB</i>     | F: 5'-AGCCTAAGGCAGCTTGACTT-3'<br>R: 5'-CTCGATGAACTTCGGGATGA-3'     |
| <i>BR</i>      | F: 5'-ACAAGGTGCTGCGGGAATCA-3'<br>R: 5'-ACTGGTGGGAGGGGTAGGTG-3'     |
| <i>CYP1A3</i>  | F: 5'-CTGGCCTCTGCCATCTTCTG-3'<br>R: 5'-TTAGCCTCCTTGCTCACATGC-3'    |
| <i>Oct3/4</i>  | F: 5'-CGACCATCTGCCGCTTTGAG-3'<br>R: 5'-CCCCCTGTCCCCATTCTTA-3'      |
| <i>Nanog</i>   | F: 5'-CCCTGATTCTCCCACCAGTCC-3'<br>R: 3'-AGTCGGGTTACCAGGCATCC-3'    |
| <i>Sox2</i>    | F: 5'-GCGAACCATCTCTGTGGTCT-3'<br>R: 5'-GGAAAGTTGGGATCGAACAA-3'     |
| <i>AFP</i>     | F: 5'-TACGTCCCTCCACCATTTC-3'<br>R: 5'-ATCCTGGTCTTTGCAGCACT-3'      |
